# Supplementary material
Source: Springer Nature journal article supplement (https://www.springermedizin.de/resource/supplementary/13014_2014_1155_MOESM5_ESM.pdf/9635000)

A

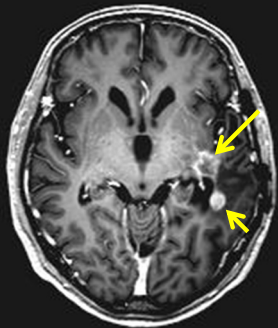

C

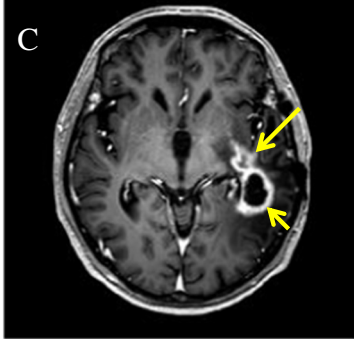

B

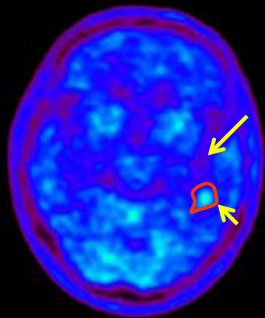

D

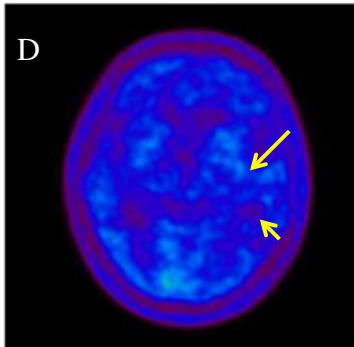

Supplement: MOESM5 [file 9635000]
